# Supplementary material for: The Cardio-Hepatic Relation in STEMI
Source: MDPI journal article supplement (doi:10.3390/jpm11121241), 2021-11-23
Supplement: s1 [file s1]

# Supplemented data:

**Table S1.** Comparison of baseline criteria of patients with the worst cardiac function parameters [EF > 45% and CVP >10mm/Hg, (*n* = 61)] and 45 patients with the same demographics and clinical characteristics but better cardiac function (*n* = 45).

|                                     | <b>CVP&gt;10mm/Hg and EF<br/>&lt;45% (<i>n</i> = 61)</b> | <b>All others (<i>n</i> = 45)</b> | <b><i>P</i> value</b> |
|-------------------------------------|----------------------------------------------------------|-----------------------------------|-----------------------|
| Age(years),median;IQR               | 72(63–83)                                                | 71 (61–81)                        | 0.823                 |
| Family history, <i>n</i> (%)        | 2(3)                                                     | 2(4.4)                            | 0.561                 |
| Hypertension , <i>n</i> (%)         | 36(59)                                                   | 25 (55)                           | 0.231                 |
| EGFR<60 , <i>n</i> (%)              | 27 (44)                                                  | 18(40)                            | 0.119                 |
| Multivessel CAD, <i>n</i> (%)       | 38 ( 62)                                                 | 23 (51)                           | 0.06                  |
| Past MI, <i>n</i> (%)               | 13(21)                                                   | 9(20)                             | 0.562                 |
| Door to balloon, median;IQR         | 50(30–68)                                                | 45 (30–65)                        | 0.167                 |
| Time to reperfusion, median,<br>IQR | 180(118–870)                                             | 160 (105–740)                     | 0.07                  |
| Heart failure, <i>n</i> (%)         | 23(38)                                                   | 14(31)                            | 0.08                  |
| VT/VF, <i>n</i> (%)                 | 19(31)                                                   | 10(20)                            | 0.04                  |
| Atrial fibrillation, <i>n</i> (%)   | 7(11)                                                    | 5(11)                             | 0.275                 |
| Mechanical ventilation <i>n</i> (%) | 15(25)                                                   | 7(16)                             | 0.02                  |
| Acute kidney injury <i>n</i> (%)    | 29(48)                                                   | 16(35)                            | 0.05                  |
